# Supplementary material for: M﻿etagenomic insights into the microbial communities of inert and oligotrophic outdoor pier surfaces of a coastal city
Source: PubMed Central journal article supplement (PMC8562002; doi:10.1186/s40168-021-01166-y), 2021-11-02

a

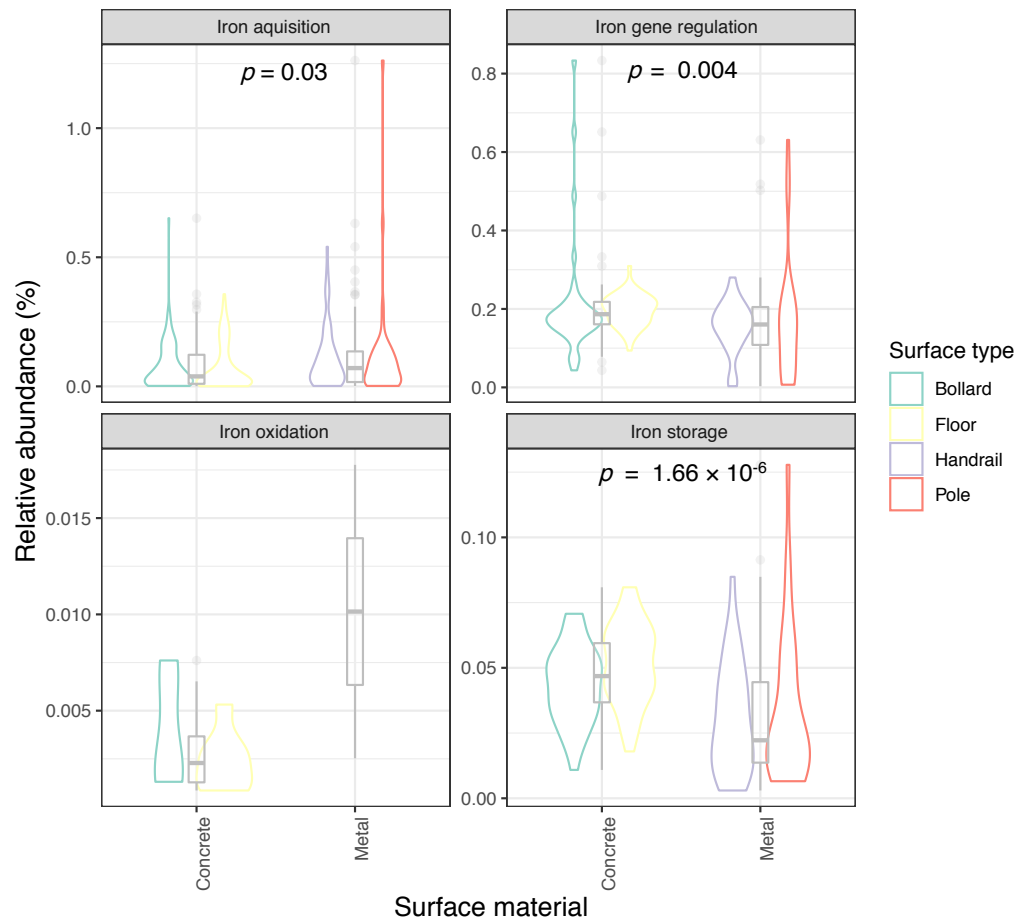

b

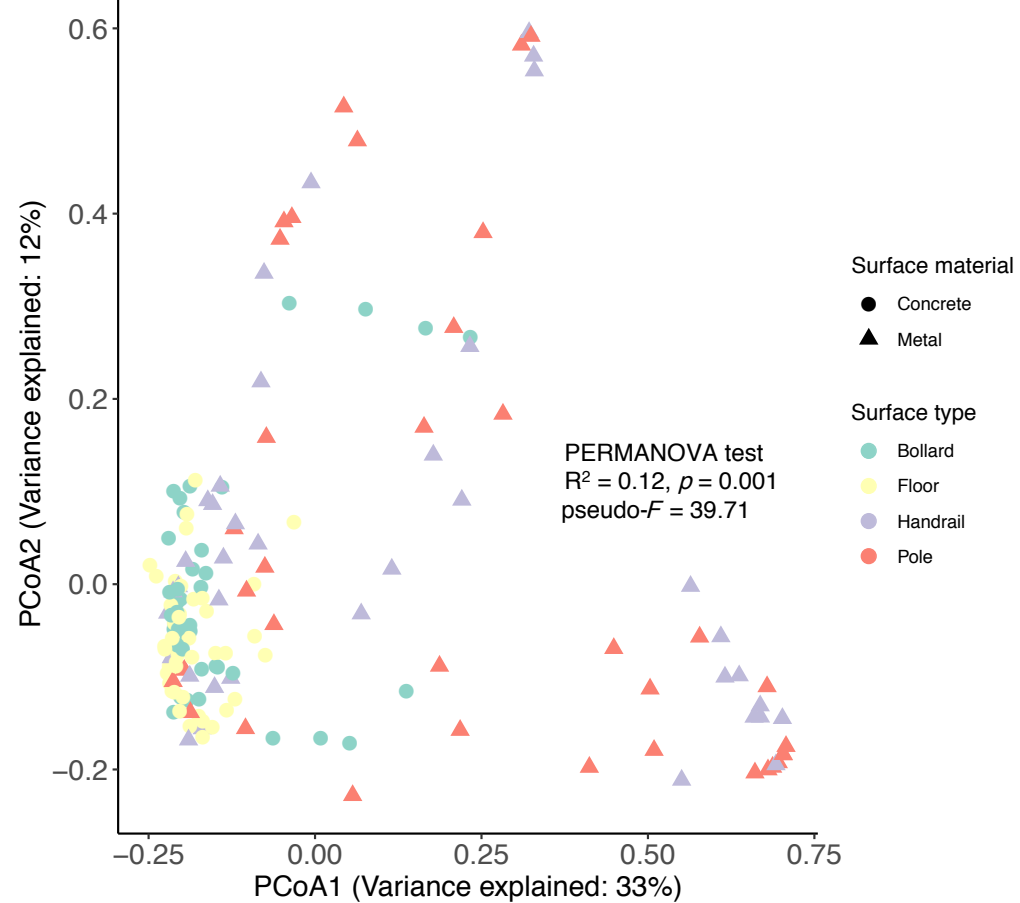

Supplement: 40168_2021_1166_MOESM9_ESM.pdf [file 40168_2021_1166_MOESM9_ESM.pdf]
